# Supplementary material
Source: publisher site journal article supplement (https://www.dovepress.com/article/547369)
Supplement: Supplementary file 1 [file 547369%20Supplementary%20Material.docx]

**
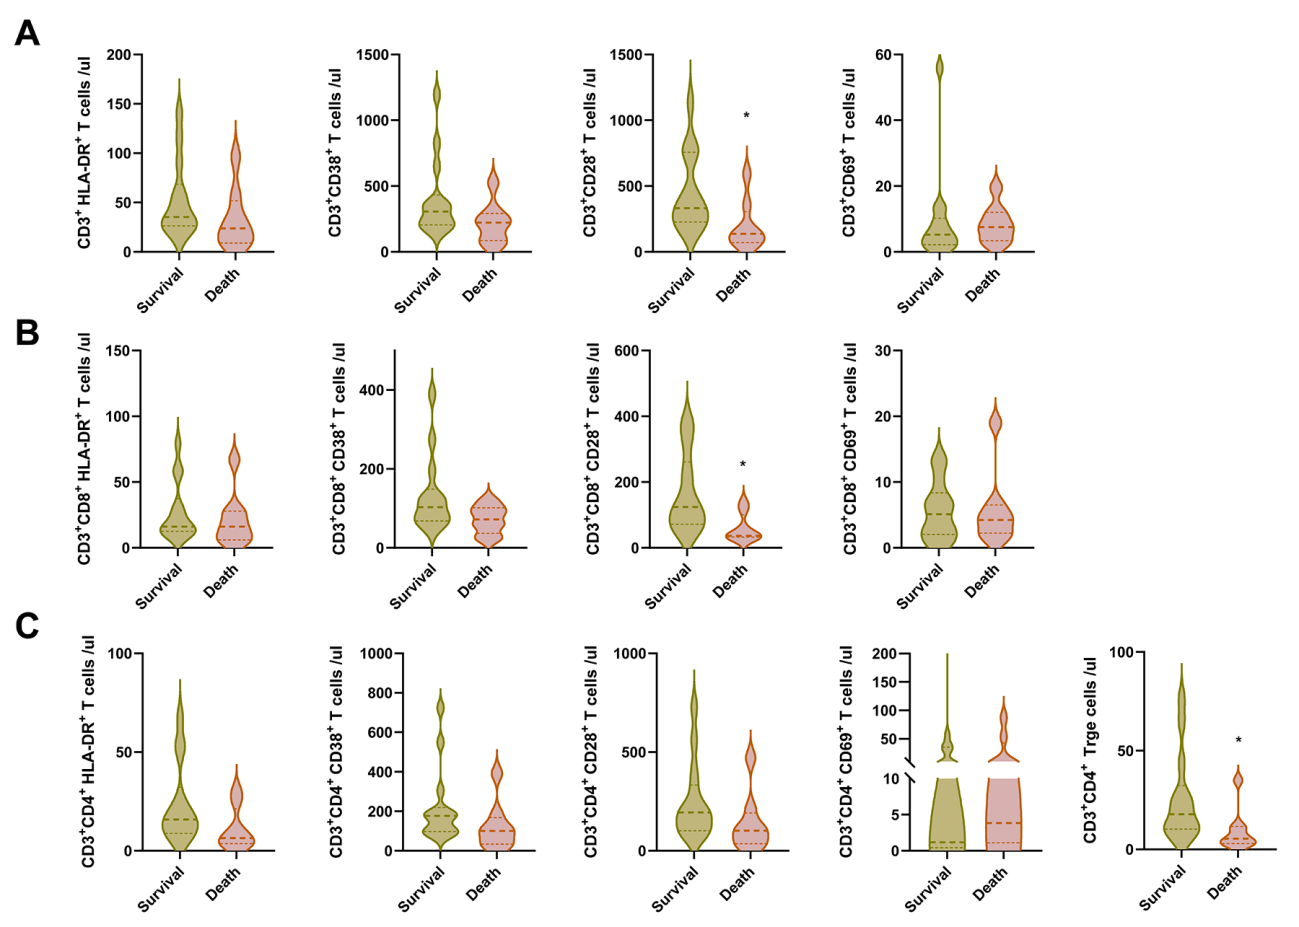
**

**Figure S1. Comparison of T cell activation status between the survival and death groups.** (A) Changes in CD3+ HLA-DR+ T cells, CD3+ CD38+ T cells, CD3+ CD28+ T cells, and CD3+ CD69+ T cells in the death groups (n = 9) compared to the survival groups (n = 13). (B) Changes in CD3+ CD8+ HLA-DR+ T cells, CD3+ CD8+ CD38+ T cells, CD3+ CD8+ CD28+ T cells, and CD3+ CD48+ CD69+ T cells in the death groups (n = 9) compared to the survival groups (n = 13). (C) Changes in CD3+ CD4+ HLA-DR+ T cells, CD3+ CD4+ CD38+ T cells, CD3+ CD4+ CD28+ T cells, CD3+ CD4+ CD69+ T cells, and CD3+ CD4+ Treg T cells in the death groups (n = 9) compared to the survival groups (n = 13). **P* < 0.05.
